# Supplementary material for: Effects of Manure and Chemical Fertilizer on Bacterial Community Structure and Soil Enzyme Activities in North China
Source: MDPI journal article supplement (doi:10.3390/agronomy11051017), 2021-05-20
Supplement: s1 [file s1]

Supplementary Materials:

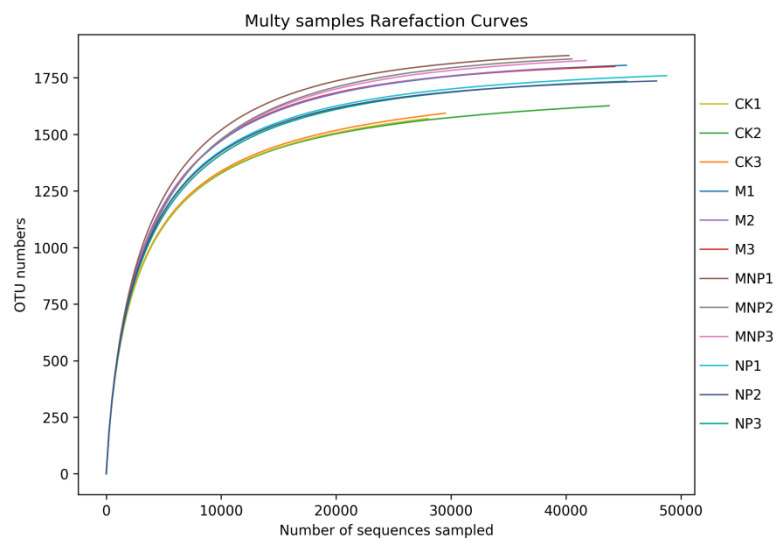

**Figure S1** Multiple-sample rarefaction curve. M: manure; NP: chemical fertilizer; MNP: manure+chemical fertilizer; CK: no fertilizer.

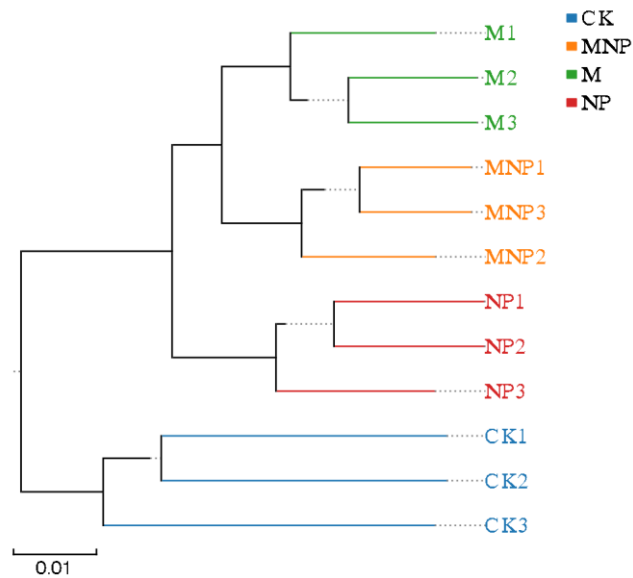

**Figure 2.** UPGMA clustering tree. M: manure; NP: chemical fertilizer; MNP: manure+chemical fertilizer; CK: no fertilizer. The distance legend equals to 0.01.

**Table 1.** ANOVA F-values and p-values of soil properties between groups.

|    | <b>F</b> | <b>p-value</b> |
|----|----------|----------------|
| pH | 0.998    | 0.442          |
| AN | 32.722   | 0.000          |
| AP | 26.463   | 0.000          |
| AK | 21.205   | 0.000          |
| OM | 11.023   | 0.003          |
| TN | 3.984    | 0.052          |
| TP | 12.271   | 0.002          |
| TK | 0.556    | 0.658          |

**Table 2.** Difference analysis of bacteria at phylum level.

| <b>Treatments</b> | <b>Proteobacteria</b> | <b>Actinobacteria</b> | <b>Acidobacteria</b> | <b>Gemmatimonadetes</b> | <b>Chloroflexi</b> | <b>Bacteroidetes</b> | <b>Nitrospirae</b> | <b>Rokubacteria</b> | <b>Verrucomicrobia</b> | <b>Firmicutes</b> | <b>Others</b> | <b>Unassigned</b> |
|-------------------|-----------------------|-----------------------|----------------------|-------------------------|--------------------|----------------------|--------------------|---------------------|------------------------|-------------------|---------------|-------------------|
| M                 | 0.3522 a              | 0.1942 b              | 0.1764 a             | 0.0896 b                | 0.0862 b           | 0.0549 b             | 0.0116 b           | 0.0080 b            | 0.0075 a               | 0.0067 a          | 0.0128 b      | 0.0001 a          |
| NP                | 0.3281 b              | 0.2360 a              | 0.1417 c             | 0.1025 a                | 0.0905 ab          | 0.0550 b             | 0.0128 b           | 0.0073 b            | 0.0067 a               | 0.0066 a          | 0.0127 b      | 0.0001 a          |
| MNP               | 0.3466 a              | 0.1835 b              | 0.1399 c             | 0.0912 b                | 0.0847 b           | 0.1074 a             | 0.0092 c           | 0.0054 c            | 0.0088 a               | 0.0070 a          | 0.0162 a      | 0.0001 a          |
| CK                | 0.3272 b              | 0.2322 a              | 0.1633 b             | 0.0867 b                | 0.0958 a           | 0.0362 b             | 0.0161 a           | 0.0119 a            | 0.0085 a               | 0.0064 a          | 0.0152 ab     | 0.0003 a          |

**Table 3.** Difference analysis of bacteria at genus level.

| <b>Treatments</b> | <b>uncultured_bacterium_f_Gemmatimonadae</b> | <b>uncultured_bacterium_c_Subgroup_6</b> | <b>Sphingomonas</b> | <b>MND1</b> | <b>uncultured_bacterium_c_MB-A2-108</b> | <b>Ellin6055</b> | <b>uncultured_bacterium_o_I_MCC26256</b> | <b>RB41</b> | <b>Arthrobacter</b> | <b>Steroidobacter</b> | <b>Others</b> | <b>Unassigned</b> |
|-------------------|----------------------------------------------|------------------------------------------|---------------------|-------------|-----------------------------------------|------------------|------------------------------------------|-------------|---------------------|-----------------------|---------------|-------------------|
| M                 | 0.0639 b                                     | 0.0753 a                                 | 0.0343 b            | 0.0308 b    | 0.0252 b                                | 0.0183 b         | 0.0178 b                                 | 0.0223 a    | 0.0158 b            | 0.0196 ab             | 0.6766 b      | 0.0001 b          |
| NP                | 0.0693 a                                     | 0.0556 c                                 | 0.0412 a            | 0.0294 b    | 0.0257 b                                | 0.0244 a         | 0.0219 ab                                | 0.0160 b    | 0.0243 a            | 0.0158 bc             | 0.6763 b      | 0.0001 b          |
| MNP               | 0.0600 b                                     | 0.0588 c                                 | 0.0393 a            | 0.0224 c    | 0.0175 c                                | 0.0208 b         | 0.0179 b                                 | 0.0163 b    | 0.0184 b            | 0.0211 a              | 0.7076 a      | 0.0001 b          |
| CK                | 0.0627 b                                     | 0.0634 b                                 | 0.0379 ab           | 0.0450 a    | 0.0351 a                                | 0.0186 b         | 0.0244 a                                 | 0.0246 a    | 0.0155 b            | 0.0137 c              | 0.6588 b      | 0.0003 a          |
